# Supplementary material for: A boranil-based conjugated microporous polymer for efficient visible-light-driven heterogeneous photocatalysis
Source: Royal Society of Chemistry journal article supplement (doi:10.1039/d1py00297j), 2021-01-01
Supplement: d1py00297j1.pdf [file d1py00297j1.pdf]

## Supporting Information

### **Boranil-based conjugated microporous polymer for the efficient visible-light-driven heterogeneous photocatalysis**

Weitao Gong<sup>a,b\*</sup>, Xiaorong Deng<sup>a</sup>, Kaixun Dong<sup>a</sup>, Lu Liu<sup>a</sup>, and Guiling Ning<sup>a,b\*</sup>

<sup>a</sup> *State Key Laboratory of Fine Chemicals, School of Chemical Engineering, Dalian University of Technology, Dalian 116024, P. R. China.*

<sup>b</sup> *Engineering Laboratory of Boric and Magnesic Functional Material Preparative and Applied Technology, Dalian, Liaoning Province, 116024, P. R. China*

---

## **Contents**

**Section 1. Experiments**

**Section 2. Syntheses**

**Section 3. XPS pattern.**

**Section 4. Pore size distributions**

**Section 5. TGA Curve**

**Section 6. SEM Image**

**Section 7. PXRD Pattern**

**Section 8. Mott-Schottky plots**

**Section 9. NMR Spectra of Catalytic Products**

**Section 10. Stability and recycling**

**Section 11. General procedure for Photocatalytic**

**Section 12. Comparison of photocatalysts**

**Section 13. Reference**

---

## Section 1. Experiments

### Characterization

All solvents and reagents were purchased from Aladdin Chemical Reagent or Energy Chemical, unless otherwise noted, and used without further purification.  $^1\text{H}$  NMR spectra were recorded using a Bruker Avance II 400 instrument with  $\text{CDCl}_3$  as solvents, where chemical shifts ( $\delta$  in ppm) were determined with a residual proton of the solvent as standard. Fourier transform infrared spectra (FTIR) analysis was measured by using JASCO IR-4100 spectrometer from 400 to  $4000\text{ cm}^{-1}$ . Solid-state  $^{13}\text{C}$  CP/MAS (cross-polarization with magic angle spinning) spectra were carried out on an Agilent DD2-500MHz nuclear magnetic resonance spectrometer. UV-Vis studies were recorded on a Hitachi UV-4100 spectrometer at room temperature. X-ray diffractions (XRD) measurements were analyzed on a Rigaku D/max-2400 diffractometer by depositing powder on a glass substrate, from  $2\theta = 2^\circ$  to  $40^\circ$  with a scanning rate of  $2^\circ\text{ min}^{-1}$  at  $25^\circ\text{C}$ . Field emission scanning electron microscopy (FE-SEM) studies were conducted by using an FEI Nova Nano SEM 450 scanning electron microscopy with 20 kV. Nitrogen sorption isotherms were measured at 77 K with a Quantachrome Autosorb iQ analyzer. Before measurement, the samples were degassed in vacuum at  $120^\circ\text{C}$  overnight. Thermogravimetric analysis (TGA) was performed by using a Mettler Toledo TGA/DSC 3+ thermal analyzer under an atmosphere of flowing  $\text{N}_2$ . All samples were heated at room temperature to  $800^\circ\text{C}$  at a heating rate of  $10^\circ\text{C min}^{-1}$ . The EPR spectra were recorded on a Bruker A200—9.5/12 EPR spectrometer. Samples were quantitatively injected into 0.5 mm quartz capillaries for ESR analysis. The date of TEMP solution with a concentration of 0.1 M was collected.

### Photoelectrochemical measurement

The photoelectrochemical properties of **TDFB-TEB** and **TCT-TEB** were studied on a CHI 660E electrochemical workstation using a standard three-electrode system. A glassy carbon electrode is used as the working electrode, platinum wire and saturated silver chloride electrode was served as the counter electrode and the reference electrode, respectively. Sample preparation: **TDFB-TEB** or **TCT-TEB** powder (2 mg) and 5% Nafion were mixed in 0.49 mL of ethanol, sonicated for 1 h, and the mixture was dripped onto a glassy carbon working mold ( $2.5\text{ }\mu\text{l}\times 4$ ), and the solvent was evaporated in a vacuum chamber for 1 h. Anhydrous sodium sulfate solution (0.2 M) was used as the electrolyte. The scan rate is 0.1 V/s in the range -1.0 V to 1.0 V.

### UV-Vis measurements of N, N, N', N'-tetramethyl-p-phenylenediamine (NTPD):

In a typical experimental procedure, three standard solutions of N, N, N', N'-tetramethyl-p-phenylenediamine (NTPD) were prepared separately in acetonitrile. **TDFB-TEB** (2.45 mg) and **TCT-TEB** (2.38 mg) were added to two of the solutions separately, and the solutions were stirred for 1h under constant irradiation by visible light (26 W LED). Observe the absorption band in the 450-650 nm range.

### EPR measurements of TEMP- $^1\text{O}_2$ :

**TDFB-TEB** (2.45 mg) and **TCT-TEB** (2.38 mg) were dispersed in 0.1 M TEMP (3 ml in CH<sub>3</sub>CN) separately, and the solutions were both continuously irradiated for 30 min with a blue lamp ( $\lambda=460$  nm) before measurement.

## Section 1. Syntheses

### Synthesis of 1,3,5-triformylphloroglucinol (S1)

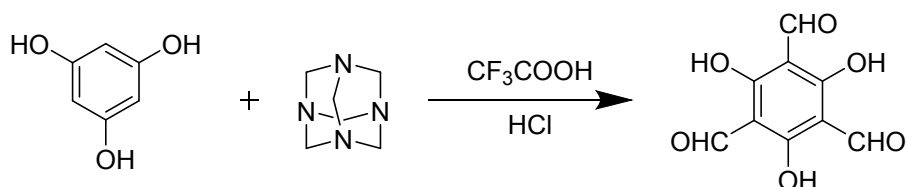

Under N<sub>2</sub> atmosphere, 90 mL CF<sub>3</sub>COOH was added to hexamethylenetetramine (14.019 g, 100 mmol) and phloroglucinol (6.306 g, 50 mmol). The mixture was heated at 100°C for 4 h. Then about 150 mL of 3 M HCl was subsequently added and the solution was heated for another 3 h at 100°C. After cooling to room temperature, the solution was filtered, extracted with dichloromethane (3×150ml). The organic phase was dried over anhydrous magnesium sulfate, and filtered. Rotary evaporation of the solution afforded an orange-pink powder. Yield: 12% (1.26 g). <sup>1</sup>H NMR (400 MHz, Chloroform-d):  $\delta$  14.12 (s, 3H), 10.16 (s, 3H).<sup>1</sup>

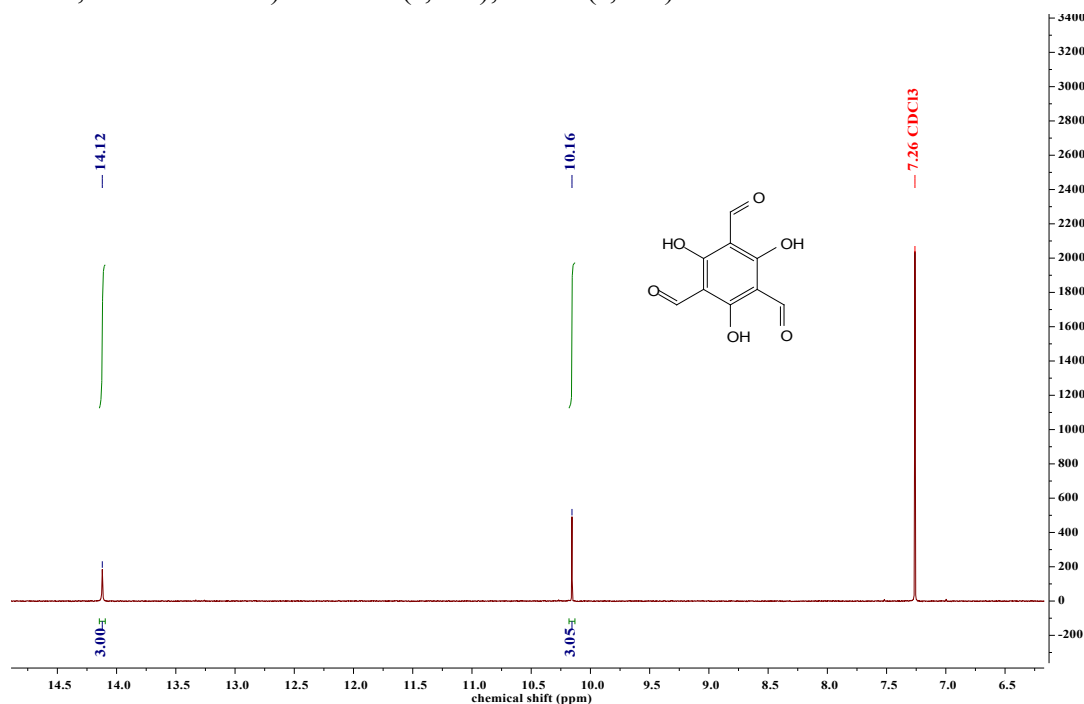

**Figure S1.** <sup>1</sup>H NMR spectrum (CDCl<sub>3</sub>, 400 MHz, rt) of 1,3,5-triformylphloroglucinol.

## Synthesis of 2,4,6-tris((4-bromophenylamino)methylene)cyclohexane-1,3,5-trione (TCT)

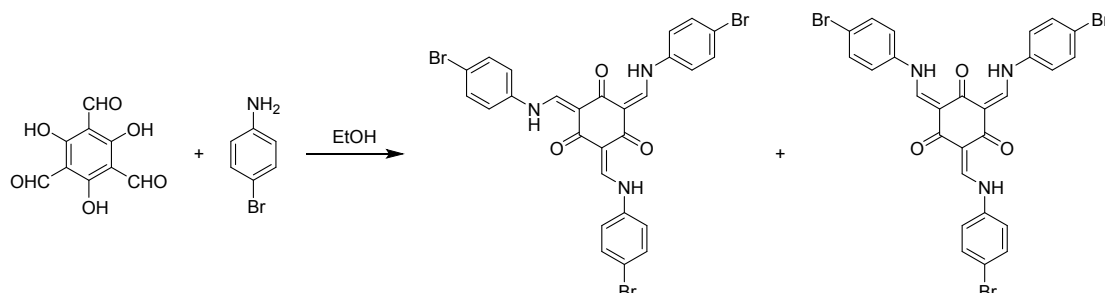

Under N<sub>2</sub> atmosphere, S1 (210 mg, 1 mmol), 4-Bromoaniline (860.15 mg, 5 mmol), and 10 mL anhydrous EtOH was added to a dried round bottom flask and heated at reflux under nitrogen for 2 days. The resulting heterogeneous mixture was filtered hot to isolate a yellow solid, which was washed with boiling EtOH (10 mL × 3) and dried in vacuo. Yield: 96% (645 mg). <sup>1</sup>H NMR (400 MHz, Chloroform-d): δ13.42-12.96 (m, 3H), 8.78-8.66 (m, 3H), 7.57-7.55 (m, 6H), 7.22-7.17 (m, 6H).<sup>2, 3</sup>

In Figure S2, the part in the insert shows that TCT-1 occupies most of the product. Therefore, the structure of TCT-1 is used to refer to TCT-1 and TCT-2 in the following text and in the manuscript, collectively referred to as TCT.

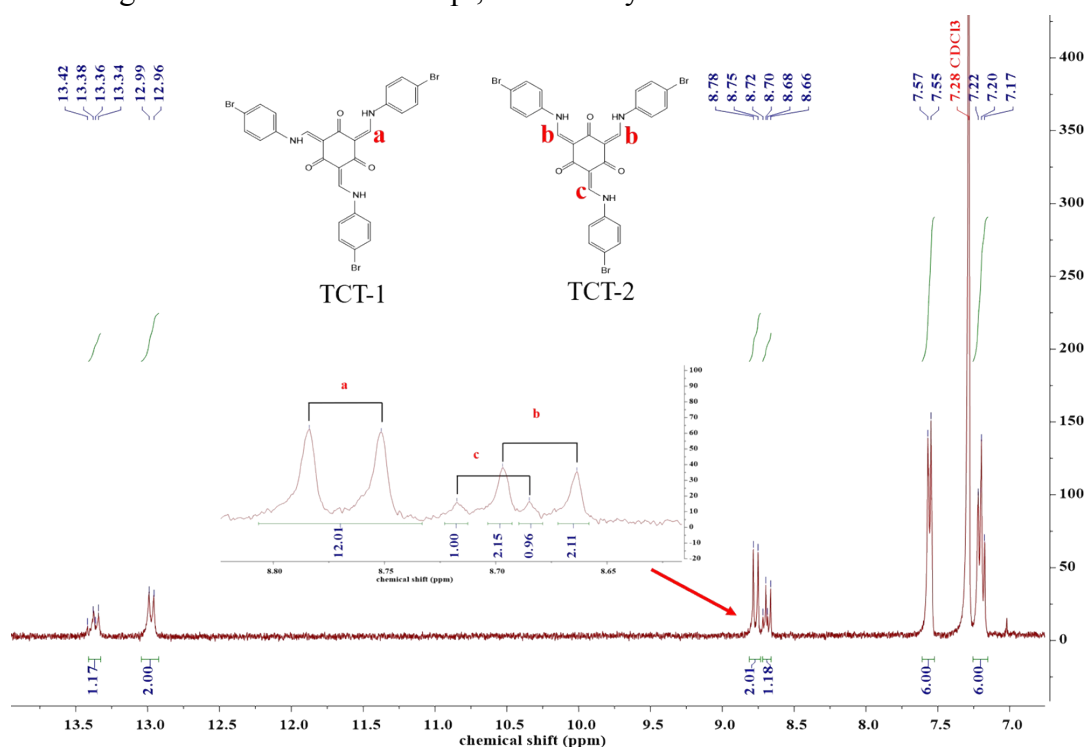

**Figure S2.** <sup>1</sup>H NMR spectrum (CDCl<sub>3</sub>, 400 MHz, rt) of TCT (inset: The partial <sup>1</sup>H NMR spectrum (CDCl<sub>3</sub>, 400 MHz, rt) of TCT.).

## Synthesis of 1,3,5-Tris(difluoroboronyloxy)-2,4,6-tris((4-bromophenylamino)methyl)-benzene(TDFB)

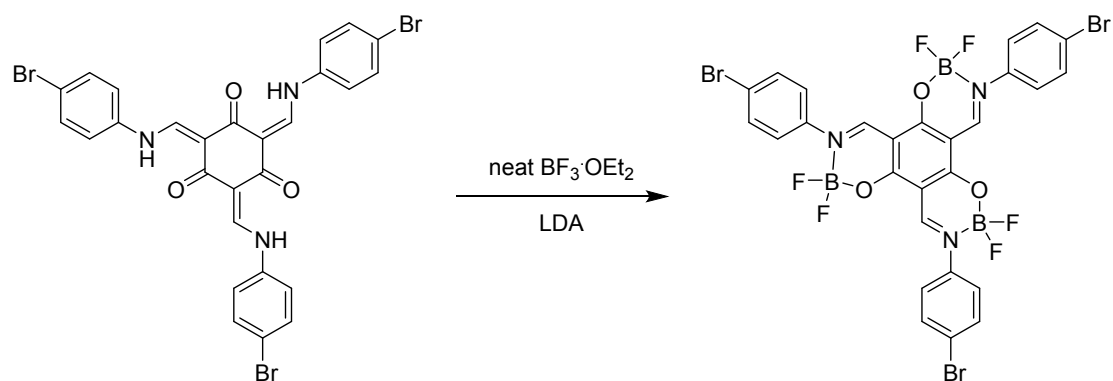

Under N<sub>2</sub> atmosphere, **TCT** (672.17 mg, 1 mmol) and neat BF<sub>3</sub> • Et<sub>2</sub>O (13 ml) was added to a dried round flask via syringe. The reaction mixture was stirred for 5 min and cooled to 0 °C. Lithium diisopropylamide (10 mmol, in 2M THF solution) was added over a period of 0.5 h and stirred for 12 h. The reaction was cooled to 0 °C and quenched by adding water (15 mL). The yellow solid product was isolated by filtration, washed with water and methanol, and dried in vacuo. (yield: 92%, 750 mg). <sup>1</sup>H NMR (400 MHz, Chloroform-d): δ 8.91 (s, 3H), 7.69-7.65 (m, 3H), 7.47-7.42 (m, 6H). <sup>2</sup> <sup>13</sup>C NMR (125 MHz, DMSO-d<sub>6</sub>): δ 167.60, 159.73, 140.92, 132.34, 125.85, 122.12, 100.89.

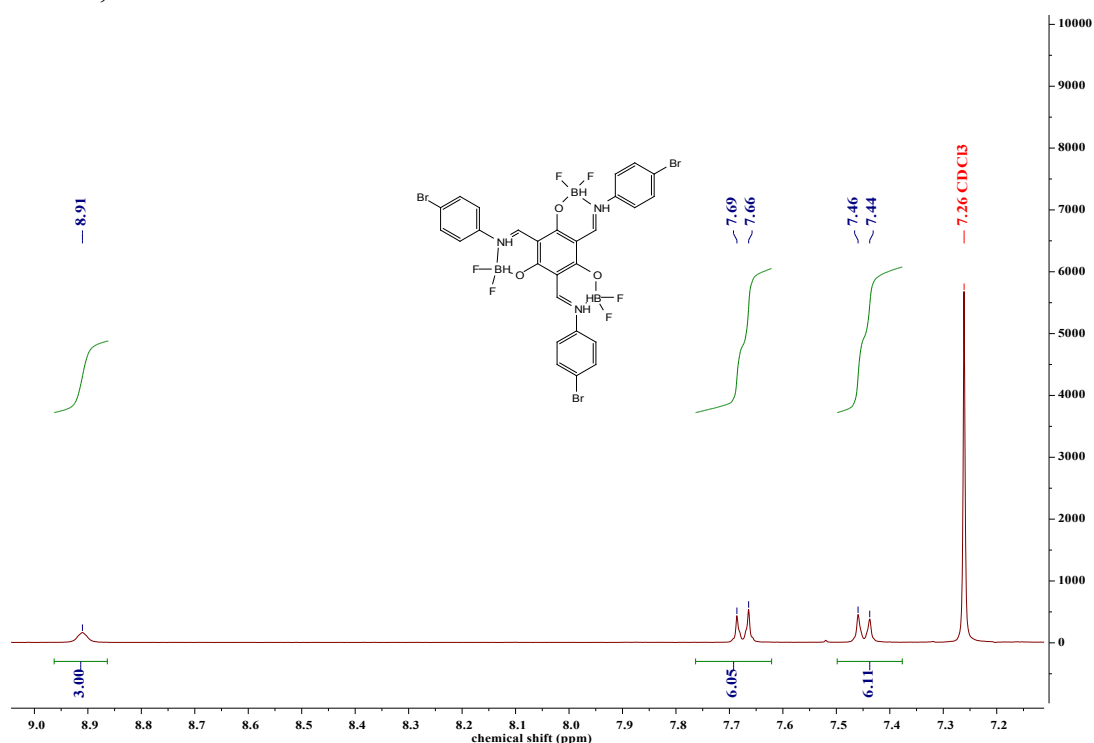

**Figure S3.** <sup>1</sup>H NMR spectrum (CDCl<sub>3</sub>, 400 MHz, rt) of **TDFB**.

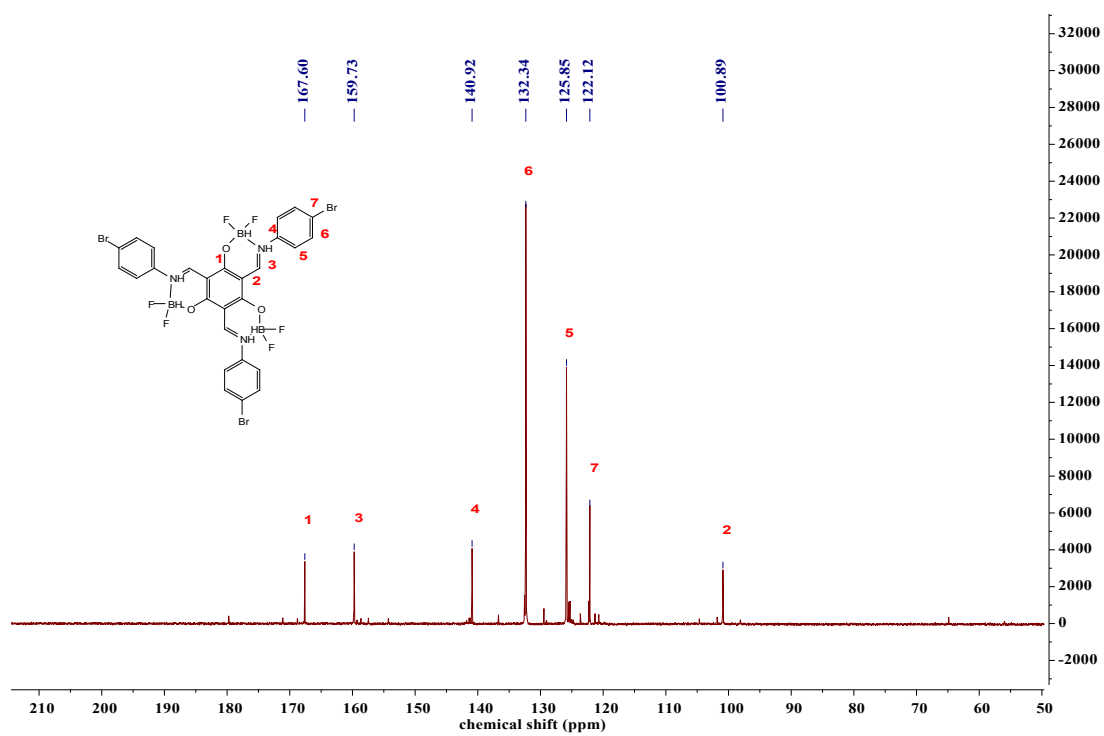

**Figure S4.**  $^{13}\text{C}$  NMR spectrum ( $\text{DMSO-d}_6$ , 125 MHz, rt) of **TDFB**.

### Synthesis 1,3,5-Tris(4-bromophenyl)benzene (S2)

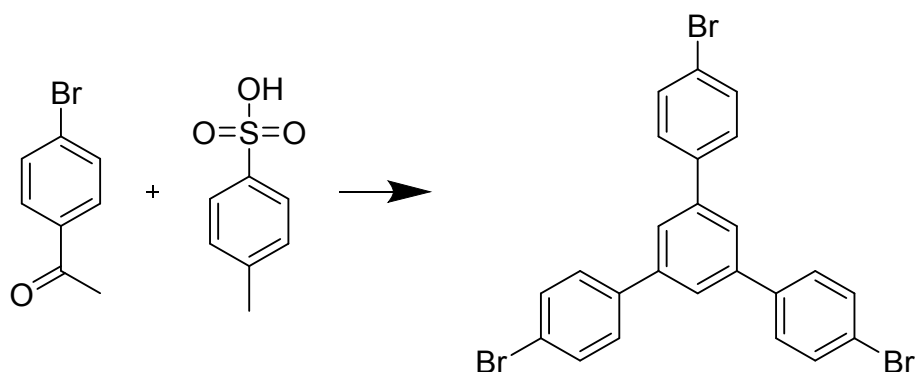

4-Bromoacetophenone (1g, 5 mmol) and p-toluenesulfonic acid (0.1 g, 0.58 mmol) were taken into a mortar and ground well. Then transferred to a 100 mL round bottom flask and the mixture was heated at 140°C such that it becomes semi-liquid. After 24 h, the brown compound was washed with a saturated solution of sodium carbonate and extracted with dichloromethane. The solvent was removed under vacuum and crude was washed with diethyl ether to get a pure product as brown solid. (Yield: 80%, 0.727 g).<sup>4</sup>

### Synthesis of 1,3,5-tris-(4-trimethylsilylethynylphenyl)benzene (S3)

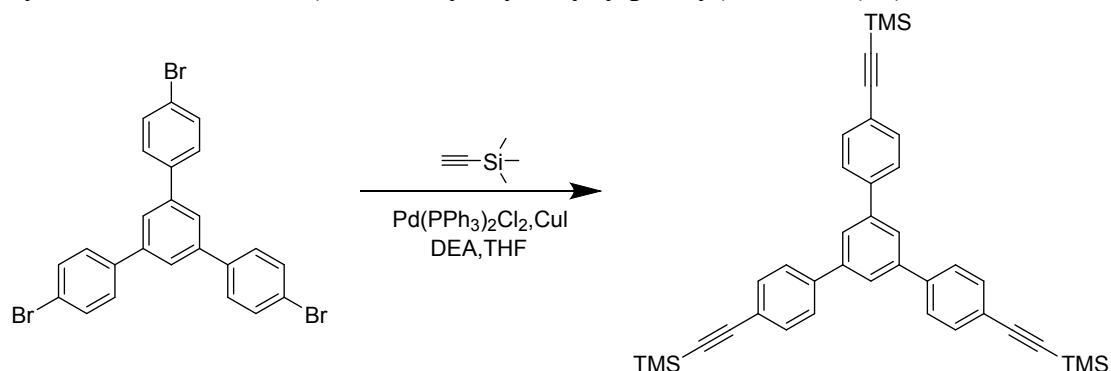

Under N<sub>2</sub> atmosphere, S2 (1.086 g, 2 mmol), CuI (11.4 mg, 0.06 mmol), triphenyl phosphine (52.65 mg, 0.2 mmol) and Pd(PPh<sub>3</sub>)<sub>2</sub>Cl<sub>2</sub> (71.77 mg, 0.1 mmol) were added to a 250 mL two-neck round bottom flask. Then dry and degassed triethylamine (100 mL) was added to this mixture and heated for 30 min at 50°C. Trimethylsilylacetylene (1.23 mL, 9 mmol) was added dropwise to the mixture under high nitrogen flow and the reaction mixture was refluxed for 36 h. The solvent was removed under vacuum and the crude was purified by column chromatography using 1% ethyl acetate (EA) in hexane mixture to afford the product as white solid. (Yield: 1.01 g, 85%).<sup>4</sup>

### Synthesis of 1,3,5-tris-(4-ethynylphenyl)benzene (TEB)

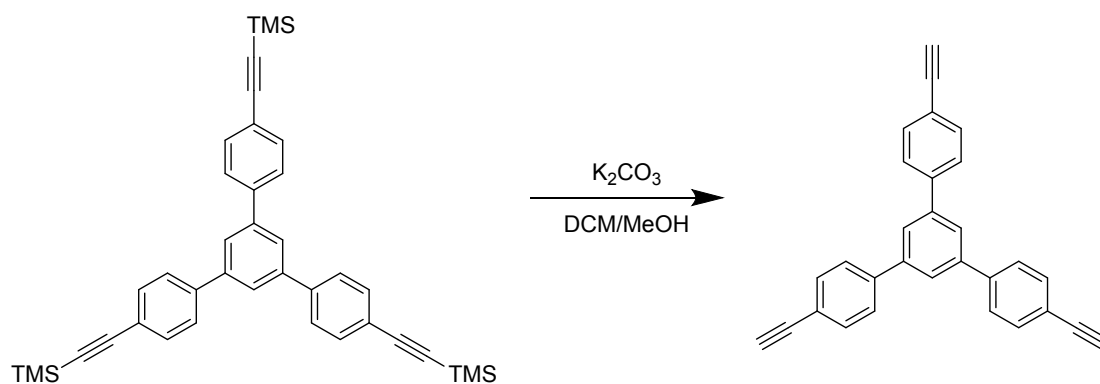

A mixture of S3 (1.2 g, 2.02 mmol) and  $K_2CO_3$  (1.26 g, 9.09 mmol) in dichloromethane (25 mL) and methanol (25 mL) was stirred at room temperature for 24 hours. The mixed reaction was added water (50 ml) and then extracted with dichloromethane (3×50ml) and. The organic phase was dried over anhydrous magnesium sulfate and then concentrated in vacuum and the crude was purified by column chromatography using hexane as eluent to afford the product as a white solid. (Yield: 80%, 612 mg).  $^1H$  NMR (400 MHz, Chloroform-d):  $\delta$  7.69 (s, 3H), 7.59 (d,  $J=8.0$  Hz, 6H), 7.54 (d,  $J=8.0$  Hz, 6H), 3.09 (s, 3H).<sup>4</sup>

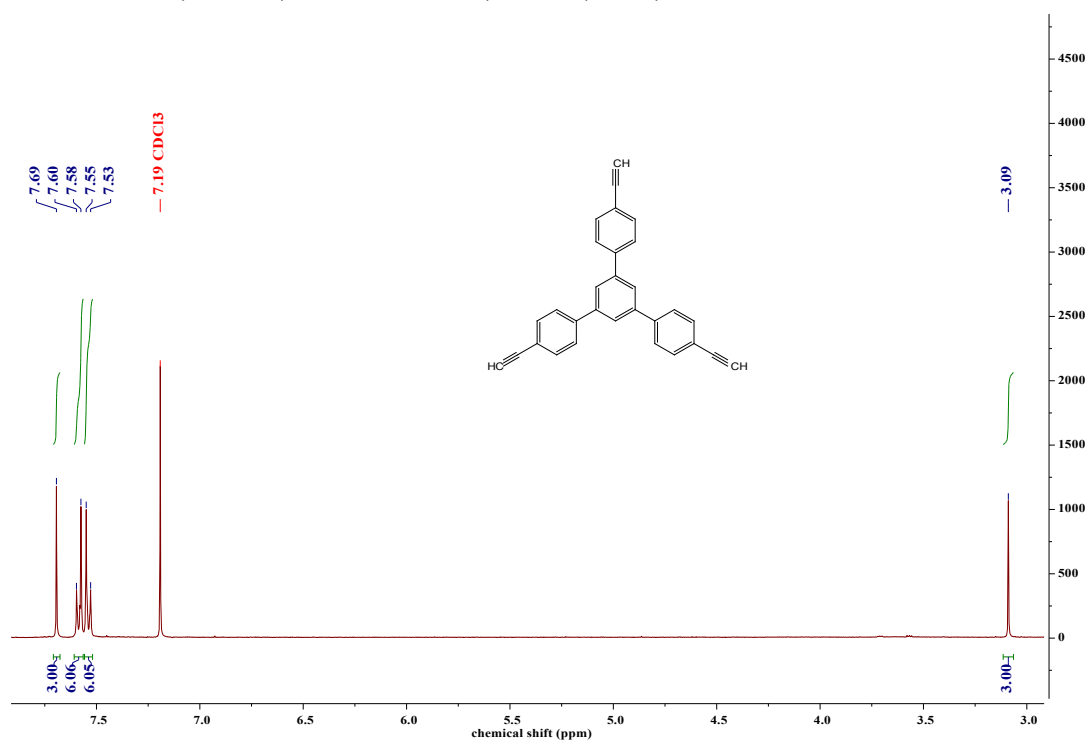

**Figure S5.**  $^1H$  NMR spectrum ( $CDCl_3$ , 400 MHz, rt) of TEB.

## Synthesis of TDFB-TEB

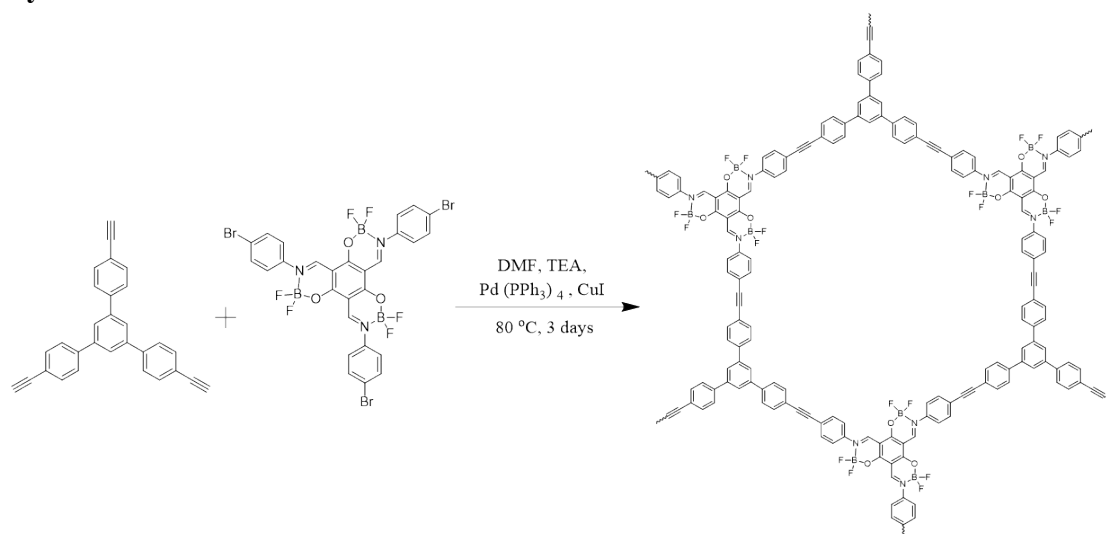

**TDFB** (0.5mmol, 408 mg), **TEB** (0.5mmol, 189 mg), Pd(PPh<sub>3</sub>)<sub>4</sub> (30 mg, 0.026 mmol), and CuI (15 mg, 0.08 mmol) were added into a 50 mL dried Schlenk tube with the mixed dry N,N-dimethyl formamide(DMF) (15 mL) and triethylamine (15 mL). The reaction suspension was degassed and then stirred at 80 °C for 3 days under an inert nitrogen atmosphere. After cooling to room temperature, the solid was obtained by filtration and washed with DMF, water, trichloromethane, methanol and acetone. Further purification was carried out by Soxhlet extraction with methanol and, trichloromethane successively for 24 h each. The product was then dried under vacuum for 24 h at 60 °C to give 450 mg (yield:95%) as a brown solid.<sup>5, 6</sup>

## Synthesis of TCT-TEB

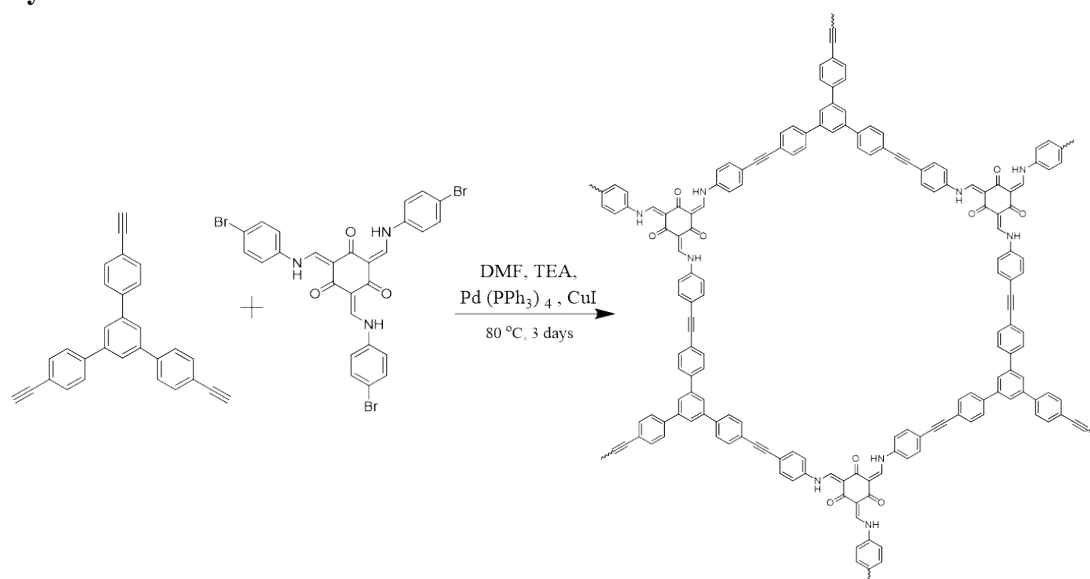

**TCT** (0.5mmol, 336 mg), **TEB** (0.5mmol, 189 mg), Pd(PPh<sub>3</sub>)<sub>4</sub> (30 mg, 0.026 mmol), and CuI (15 mg, 0.08 mmol) were added into a 50 mL dried Schlenk tube with the mixed dry N,N-dimethyl formamide(DMF) (15 mL) and triethylamine (15 mL). The reaction suspension was degassed and then stirred at 80 °C for 3 days under an inert nitrogen atmosphere. After cooling to room temperature, the solid was obtained by filtration and washed with DMF, water, trichloromethane, methanol and acetone. Further purification was carried out by Soxhlet extraction with methanol and, trichloromethane successively for 24 h each. The product was then dried under vacuum for 24 h at 60 °C to give 384 mg (yield:95%) as a yellow solid.<sup>5, 6</sup>

### Section 3. XPS pattern.

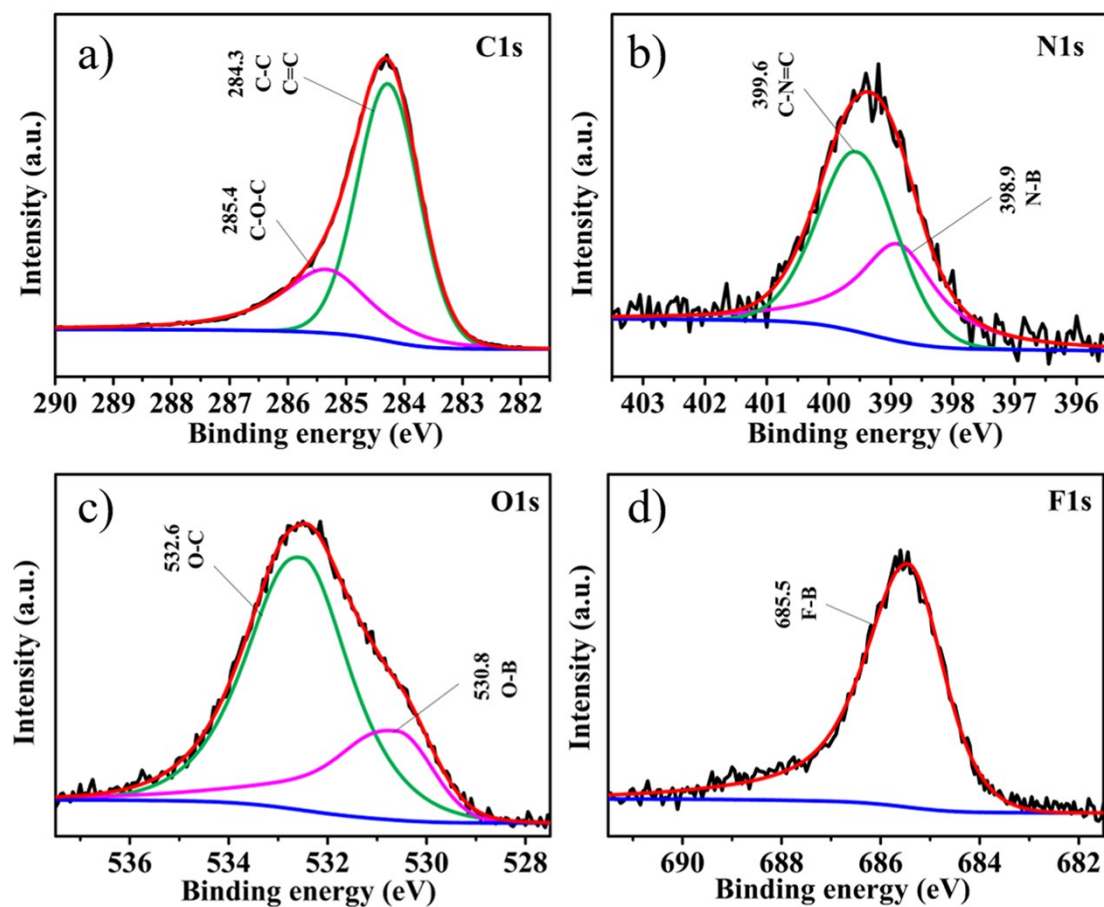

**Figure S6.** a) C 1s region XPS spectrum, b) N 1s region XPS spectrum, c) O 1s region XPS spectrum, and d) F 1s region XPS spectrum of **TDFB-TEB** before photocatalysis.

| Name | Peak BE | Height CPS | FWHM eV | Area (P)CPS.eV | Atomic % |
|------|---------|------------|---------|----------------|----------|
| C1s  | 284.32  | 30886.46   | 1.44    | 54738.65       | 78.42    |
| N1s  | 399.36  | 2074.59    | 1.77    | 5081.66        | 4.47     |
| O1s  | 532.45  | 5163.02    | 3.16    | 18034.57       | 9.59     |
| F1s  | 685.54  | 4058.8     | 1.85    | 10392.14       | 4.09     |
| B1s  | 192.69  | 305.02     | 1.24    | 919.94         | 3.43     |

**Table S1.** The XPS peak table of **TDFB-TEB**.

## Section 4. Pore size distributions

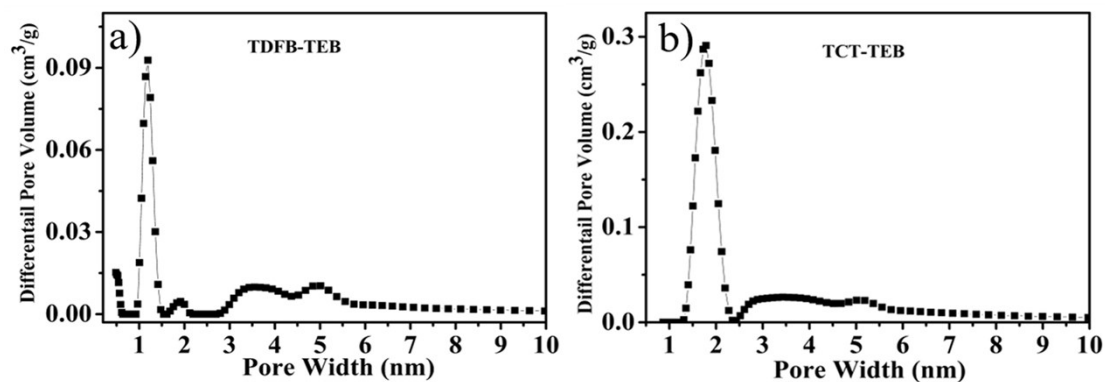

Figure S7. Pore size distribution of a) TDFB-TEB and b) TCT-TEB.

## Section 5. TGA Curve

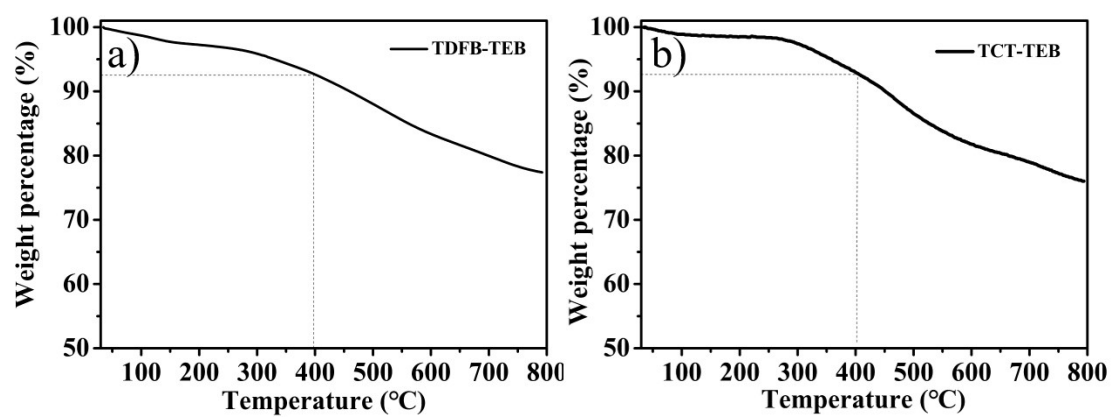

Figure S8. Thermogravimetric analysis of a) TDFB-TEB and b) TCT-TEB.

## Section 6. SEM Image

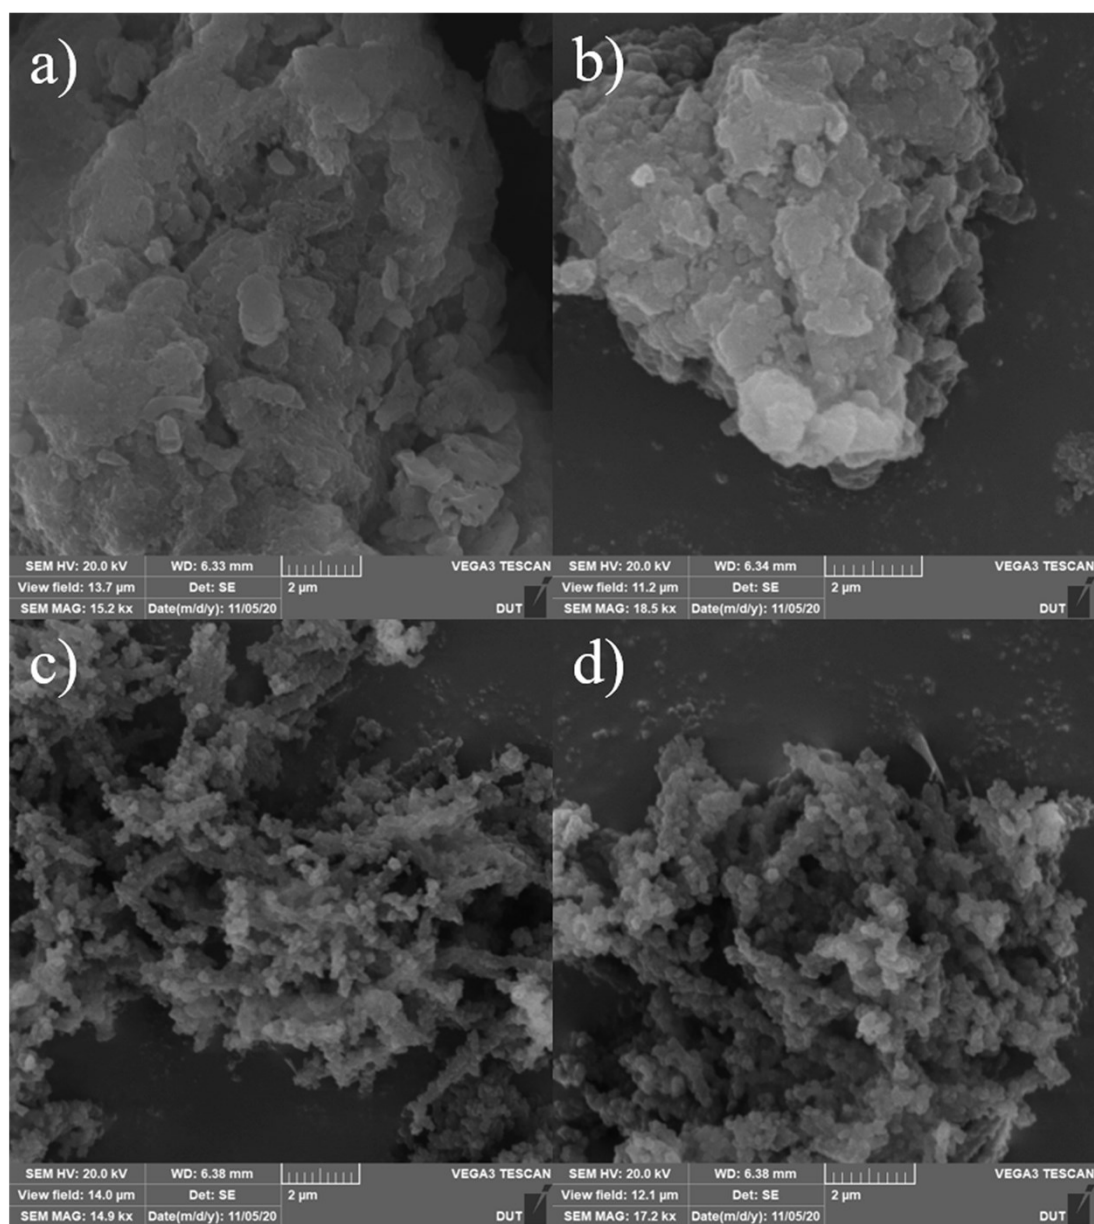

**Figure S9.** SEM images of a), b) TDFB-TEB and c), d) TCT-TEB.

## Section 7. XRD Pattern

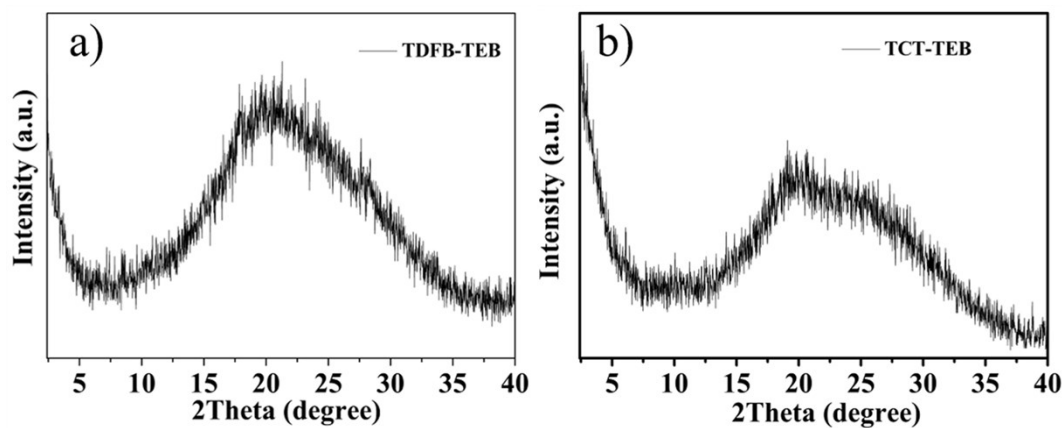

Figure S10. Powder X-ray diffraction pattern of a) TDFB-TEB and b) TCT-TEB.

## Section 8. Mott-Schottky plots

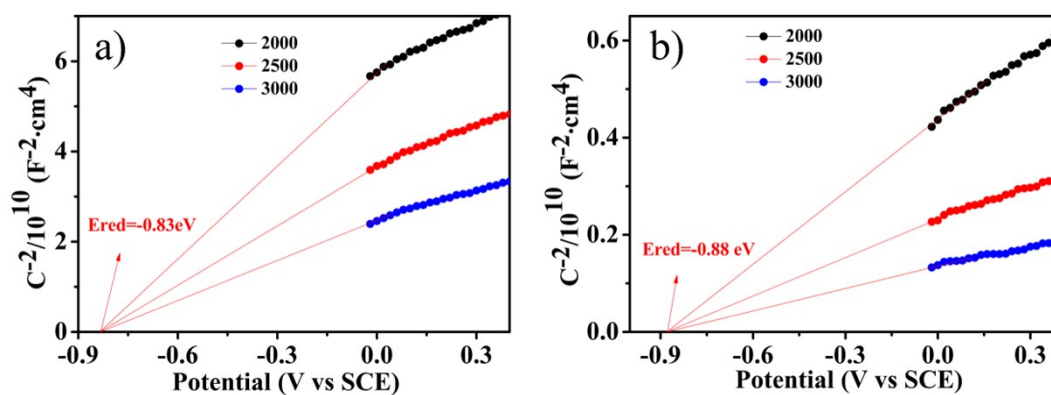

Figure S11. Mott-Schottky plots of a) TDFB-TEB and b) TCT-TEB.

## Section 9. Characterization Data of Catalytic Products

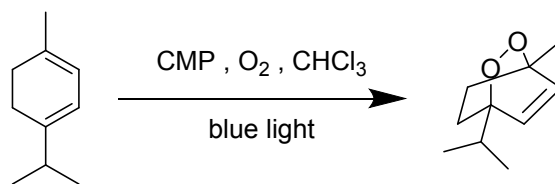

Reaction conditions:  $\alpha$ -terpinene (0.5mmol), photocatalyst (2.45mg, 0.5% mmol),  $CHCl_3$ (5mL), air, 24W blue LED lamp, room temperature (RT), 3h; Conversion was determined by  $^1H$  NMR.

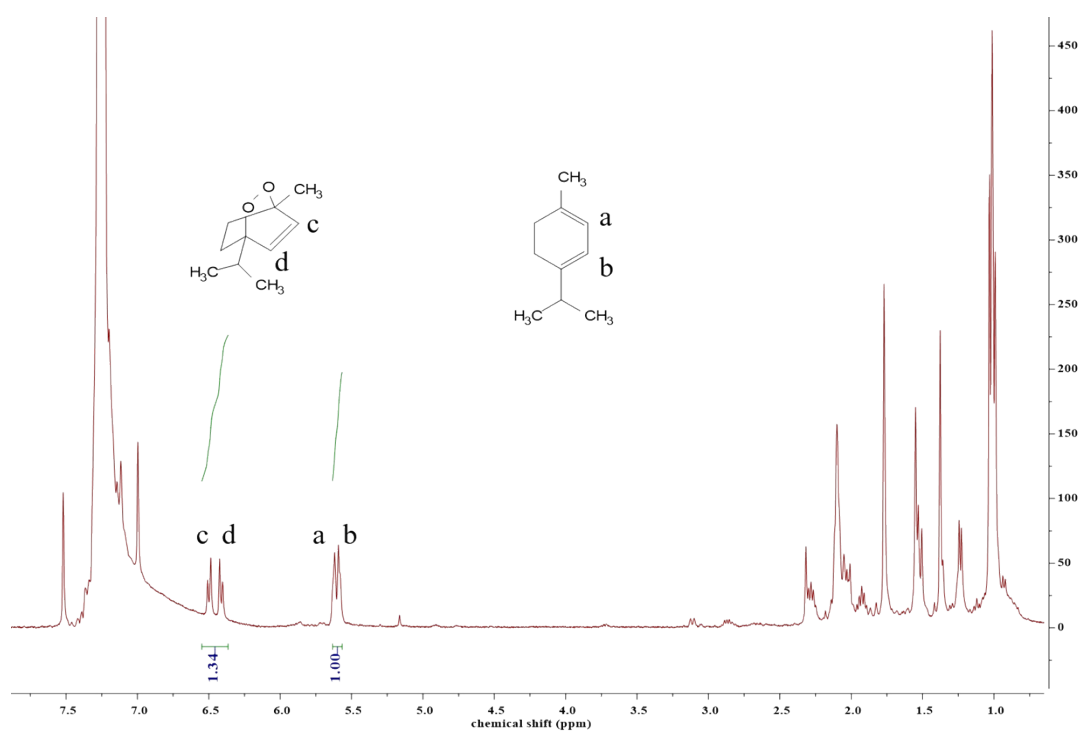

**Figure S12.**  $^1H$  NMR spectra (CDCl<sub>3</sub>, 400 MHz, rt) of photocatalytically oxidation  $\alpha$ -terpinene to  $\alpha$ -pinworm ether.

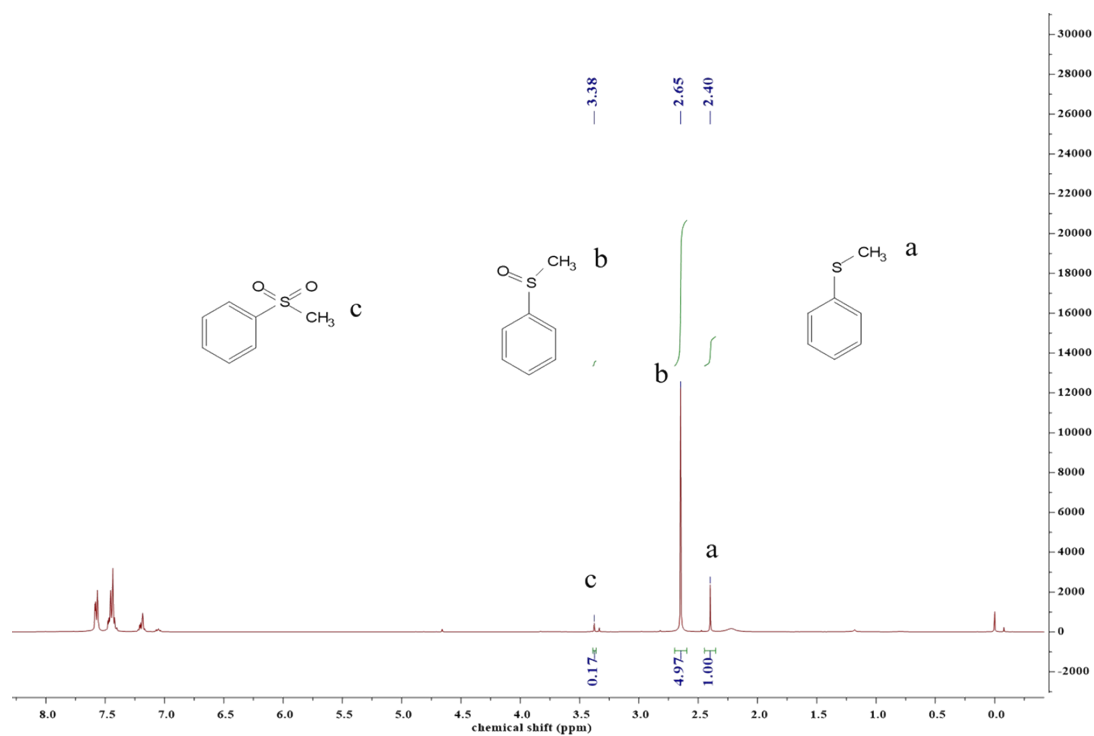

**Figure S13.**  $^1\text{H}$  NMR spectra ( $\text{CDCl}_3$ , 400 MHz, rt) of sulfide oxidation mixture.

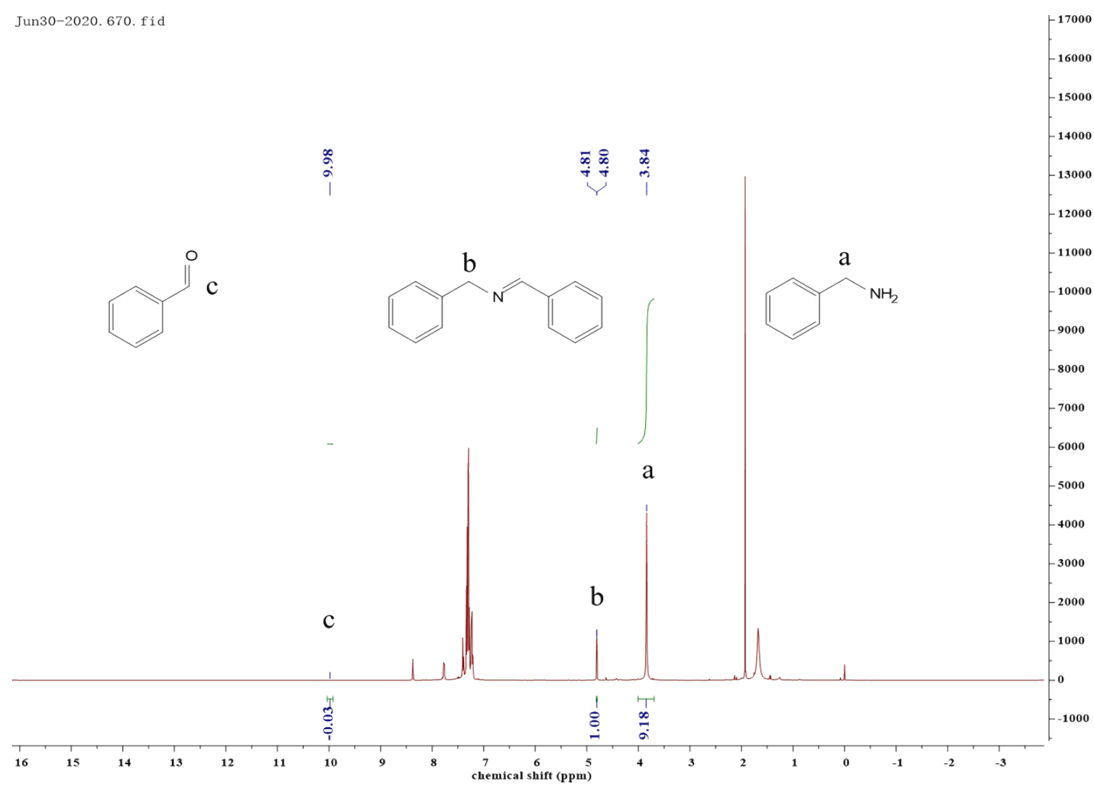

**Figure S14**  $^1\text{H}$  NMR spectra ( $\text{CDCl}_3$ , 400 MHz, rt) of phenylmethanamine oxidation.

## Section 10. Stability and cycling

### Recycle experiments of aerobic oxidation of sulfide to sulfoxide

**TDFB-TEB** (2.6mg, 2.5  $\mu\text{mol}$ , 0.5 mol% based on monomer) and sulfide (0.5 mmol) in methanol (5 mL) were stirred at room temperature under the irradiation of a 26 W blue LED in the presence of air. After the first run reaction was finished, the photocatalyst **TDFB-TEB** was recovered by centrifugation, and thoroughly washed with ethyl acetate and dichloromethane several times to remove any residual products or unreacted substrates. The recovered **TDFB-TEB** was dried under vacuum at 100°C overnight. The used photocatalyst was re-employed in the next cycle under identical conditions.

### Recycle experiments of benzylamine photocatalytic oxidative coupling

**TDFB-TEB** (2.6mg, 2.5  $\mu\text{mol}$ , 0.5 mol% based on monomer) and amine (0.5 mmol) in acetonitrile (5 mL) were mixed and stirred at room temperature under the irradiation of a 26 W blue LED in the presence of air. After the first run reaction was finished, the photocatalyst **TDFB-TEB** was recovered by centrifugation, and thoroughly washed with acetonitrile and dichloromethane several times to remove any residual products or unreacted substrates. The recovered **TDFB-TEB** was dried under vacuum at 100°C for overnight. The used photocatalyst was re-employed in the next cycle under identical conditions.

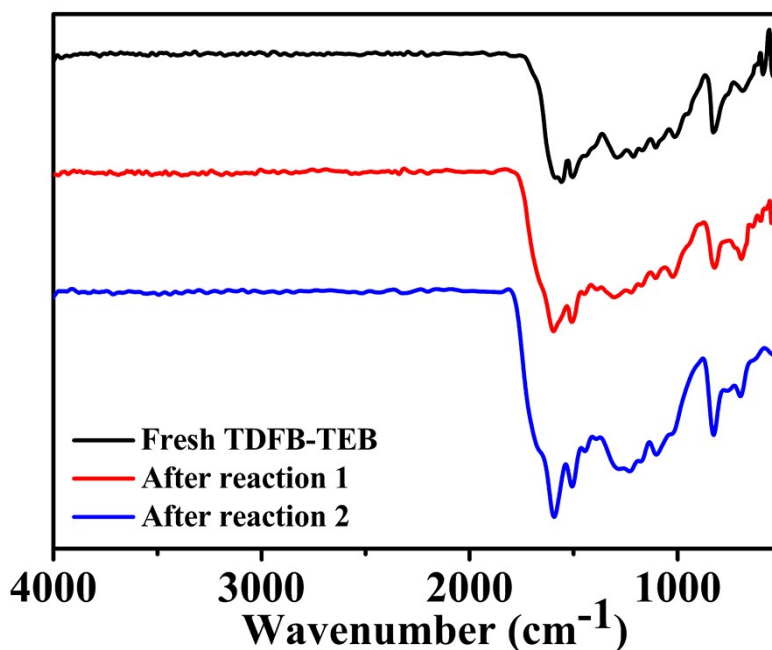

**Figure S15.** The FT-IR spectra of the fresh and recovered **TDFB-TEB**. (Reaction 1 is the oxidative amine coupling, reaction 2 is the sulfides oxidation.)

---

## Section 11. General procedure for Photocatalytic

### General procedure of aerobic oxidation of sulfide to sulfoxide:

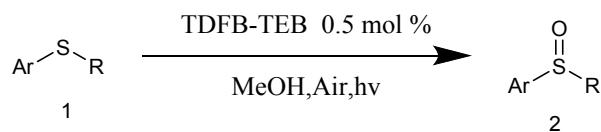

A mixture of **TDFB-TEB** (2.45 mg, 2.5  $\mu\text{mol}$ , 0.5 mol% based on the monomer) and sulfide (0.5 mmol) in MeOH (5 mL) was stirred under air at room temperature over 26 W blue LED irradiation. Reaction progress was monitored by TLC (hexane:  $\text{CH}_2\text{Cl}_2$  v/v 1:1) and  $^1\text{H}$  NMR. The catalyst was removed by filtration, and the filtrate was dried under vacuum.  $^1\text{H}$  NMR was taken for the crude product, and the ratio between the integrated peaks of the starting material and product was used to calculate the conversions. The integrated peaks of the sulfoxide and sulfone were used to calculate selectivity. The  $^1\text{H}$  NMR spectra of the sulfoxides are consistent with the previous literature values.<sup>7,8</sup>

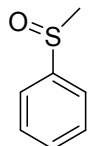

#### (Methylsulfinyl)benzene (2A)

The title compound was made following the general procedure using thioanisole (62 mg, 0.5 mmol) as the starting material. The product was obtained as a colorless liquid (99% yield).

$^1\text{H}$  NMR (400 MHz, Chloroform- $d$ ):  $\delta$  2.65 (s, 3H), 7.45 (m, 3H), 7.57 (m, 2H).

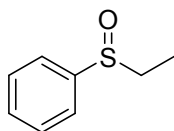

### **(Ethylsulfinyl)benzene (2B)**

The title compound was made following the general procedure using ethyl(phenyl)sulfane (69 mg, 0.5 mmol) as the starting material. The product was obtained as a colorless liquid (99% yield).

<sup>1</sup>H NMR (400 MHz, Chloroform-d):  $\delta$  1.2 (t,  $J_1 = 4.0$  Hz,  $J_2 = 8.0$  Hz, 3H), 2.88 (m, 1H), 2.92 (m, 1H), 7.51 (m, 3H), 7.61 (m, 2H).

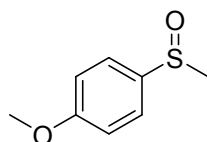

### **1-Methoxy-4-(methylsulfinyl)benzene (2C)**

The title compound was made following the general procedure using thioanisole (77 mg, 0.5 mmol) as the starting material. The product was obtained as a colorless liquid (99% yield).

<sup>1</sup>H NMR (400 MHz, Chloroform-d):  $\delta$  2.62 (s, 3H), 3.76 (s, 3H), 6.94 (d,  $J = 8.0$  Hz, 2H), 7.51 (d,  $J = 8.0$  Hz, 2H).

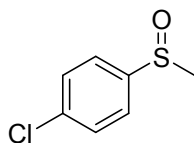

### **1-Chloro-4-(methylsulfinyl)benzene (2D)**

The title compound was made following the general procedure using (4-chlorophenyl)-(methyl)sulfane (79 mg, 0.5 mmol) as the starting material. The product was obtained as a colorless liquid (99% yield).

<sup>1</sup>H NMR (400 MHz, Chloroform-d):  $\delta$  2.77 (s, 3H), 7.55 (d,  $J = 8.0$  Hz, 2H), 7.62 (d,  $J = 8.0$  Hz, 2H).

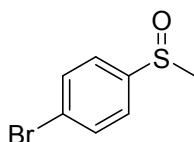

**1-bromo-4-(methylsulfinyl)benzene (2E)**

The title compound was made following the general procedure using (4-bromophenyl)-(methyl)sulfane (102 mg, 0.5 mmol) as the starting material. The product was obtained as a colorless liquid (97% yield).

$^1\text{H}$  NMR (400 MHz, Chloroform- $d$ ):  $\delta$  2.75 (s, 3H), 7.26 (m, 2H), 7.88 (m, 2H).

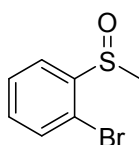

**1-bromo-2-(methylsulfinyl)benzene (2F)**

The title compound was made following the general procedure using (2-bromophenyl)-(methyl)sulfane (102 mg, 0.5 mmol) as the starting material. The product was obtained as a colorless liquid (94% yield).

$^1\text{H}$  NMR (400 MHz, Chloroform- $d$ ):  $\delta$  2.74 (s, 3H), 7.28~7.31 (m, 1H), 7.47~7.52 (m, 2H), 7.855 (d,  $J=4.0$  Hz, 1H).

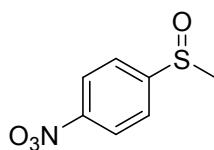

**1-bromo-4-(methylsulfinyl)benzene (2G)**

The title compound was made following the general procedure using (4-bromophenyl)-(methyl)sulfane (93 mg, 0.5 mmol) as the starting material. The product was obtained as a pale yellow solid (71% yield).

$^1\text{H}$  NMR (400 MHz, Chloroform- $d$ ):  $\delta$  2.74 (s, 3H), 7.78 (d,  $J = 8.0$  Hz, 2H), 8.31 (d,  $J=8.0$  Hz, 2H).

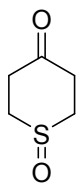

**tetrahydro-4H-thiopyran-4-one 1-oxide (2H)**

The title compound was made following the general procedure using tetrahydro-4H-thiopyran-4-one (58 mg, 0.5 mmol) as the starting material. The product was obtained as a colorless liquid (99% yield).

<sup>1</sup>H NMR (400 MHz, Chloroform-d):  $\delta$  1.97 (dd,  $J_1 = 20.0$  Hz,  $J_2 = 20.0$  Hz, 1H), 2.36 (m, 1H), 2.77 (t,  $J_1 = 12.0$  Hz,  $J_2 = 16.0$  Hz, 1H), 2.99 (d,  $J = 16.0$  Hz, 1H), 3.23 (s, 2H), 3.26 (s, 2H).

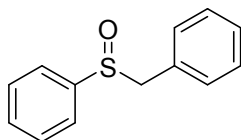

**(benzylsulfinyl)benzene (2I)**

The title compound was made following the general procedure using benzyl(phenyl)sulfane (100 mg, 0.5 mmol) as the starting material. The product was obtained as a colorless liquid (99% yield).

<sup>1</sup>H NMR (400 MHz, Chloroform-d):  $\delta$  4.03 (dd,  $J_1 = 4.0$  Hz,  $J_2 = 4.0$  Hz, 2H), 6.97 (d,  $J = 8.0$  Hz, 2H), 7.21~7.27 (m, 3H), 7.35~7.44 (m, 5H).

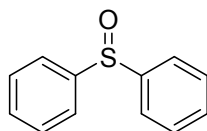

**(Phenylsulfinyl)benzene (2J)**

The title compound was made following the general procedure using diphenylsulfide (93 mg, 0.5 mmol) as the starting material. The product was obtained as a colorless liquid (30% yield).

$^1\text{H}$  NMR (400 MHz, Chloroform- $d$ ):  $\delta$  7.28-7.35 (m, 6H), 7.53-7.55 (m, 4H).

---

### General procedure for aerobic oxidation coupling of amine:

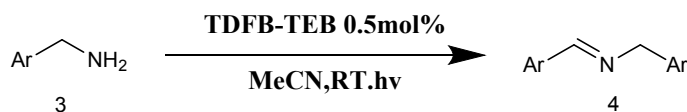

The mixture of **TDFB-TEB** (2.45 mg, 2.5  $\mu$ mol, 0.5 mol% based on the monomer) and respective amine (0.5 mmol) in MeCN (5 mL) was stirred under air at room temperature over 26 W blue LED. Reaction progress was monitored by TLC (hexane: CH<sub>2</sub>Cl<sub>2</sub> v/v 2:1) and <sup>1</sup>H NMR. The catalyst was removed by filtration, and the filtrate was dried under vacuum. <sup>1</sup>H NMR was taken for the crude product, and the ratio between the integrated peak of the starting material and product was used to calculate the conversion, integrated peak of the product and byproduct was used to calculate selectivity. The <sup>1</sup>H NMR spectra of the products are consistent with the previous literature values.<sup>8,9</sup>

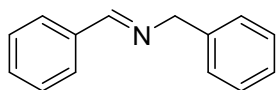

#### (E)-N-benzyl-1-phenylmethanimine (4A)

The titled compound was made following the general procedure using phenylmethanamine (54 mg, 0.5 mmol) as starting material. The product was obtained as a colorless liquid (> 99% yield).

<sup>1</sup>H NMR (400 MHz, Chloroform-d):  $\delta$  4.75 (s, 2H), 7.00~7.04 (m, 1H), 7.07~7.11 (m, 4H), 7.25~7.30 (m, 3H), 7.74~7.78 (m, 2H), 8.33 (s, 1H).

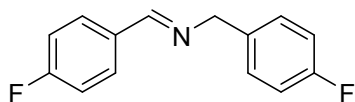

**(E)-N-(4-fluorobenzyl)-1-(4-fluorophenyl)methanimine (4B)**

The titled compound was made following the general procedure using (4-fluorophenyl)-methanamine (63 mg, 0.5 mmol) as starting material. The product was obtained as a colorless liquid (> 99% yield).

<sup>1</sup>H NMR (400 MHz, Chloroform-d): δ 4.67 (s, 2H), 7.16-7.18 (m, 2H), 7.21-7.23 (m, 2H), 7.29-7.31 (m, 2H), 7.60-7.62 (m, 2H), 8.24 (s, 1H).

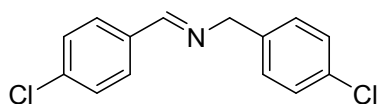

**(E)-N-(4-chlorobenzyl)-1-(4-chlorophenyl)methanimine (4C)**

The titled compound was made following the general procedure using (4-chlorophenyl)-methanamine (71 mg, 0.5 mmol) as starting material. The product was obtained as a colorless liquid (> 99% yield).

<sup>1</sup>H NMR (400 MHz, Chloroform-d): δ 4.62 (s, 2H), 6.77-6.79 (m, 2H), 6.80-6.82 (m, 2H), 7.13-7.15 (m, 2H), 7.60-7.62 (m, 2H), 8.19 (s, 1H).

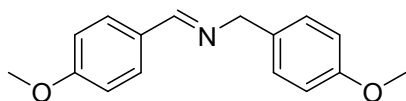

**(E)-N-(4-methoxybenzyl)-1-(4-methoxyphenyl)methanimine (4D)**

The titled compound was made following the general procedure using (4-methoxyphenyl)-methanamine (69 mg, 0.5 mmol) as starting material. The product was obtained as a colorless liquid (> 99% yield).

<sup>1</sup>H NMR (400 MHz, Chloroform-d): δ 3.91 (s, 6H), 4.86 (s, 2H), 7.25-7.27 (m, 4H), 7.29-7.30 (m, 2H), 7.65-7.67 (m, 2H), 8.42 (s, 1H).

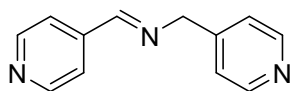

**(E)-1-(pyridin-4-yl)-N-(pyridin-4-ylmethyl)methanimine (4E)**

The titled compound was made following the general procedure using pyridin-4-ylmethanamine (54 mg, 0.5 mmol) as starting material. The product was obtained as a colorless liquid (> 99% yield).

<sup>1</sup>H NMR (400 MHz, Chloroform-d):  $\delta$  4.91 (s, 2H), 7.08-7.15 (m, 2H), 7.56-7.57 (m, 2H), 8.50 (s, 1H), 8.65 (m, 2H), 8.79 (s, 2H).

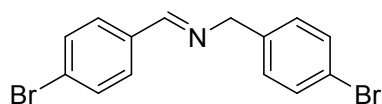

**(E)-N-(4-bromobenzyl)-1-(4-bromophenyl)methanimine (4F)**

The titled compound was made following the general procedure using (4-bromophenyl)-methanamine (93 mg, 0.5 mmol) as starting material. The product was obtained as a colorless liquid (> 99% yield).

<sup>1</sup>H NMR (400 MHz, Chloroform-d):  $\delta$  4.94 (s, 2H), 6.97-7.08 (m, 4H), 7.22-7.24 (m, 2H), 7.32-7.42 (m, 2H), 8.41 (s, 1H).

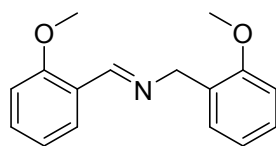

**(E)-N-(2-methoxybenzyl)-1-(2-methoxyphenyl)methanimine (4G)**

The titled compound was made following the general procedure using (2-methoxyphenyl)-methanamine (69 mg, 0.5 mmol) as starting material. The product was obtained as a colorless liquid (> 99% yield).

<sup>1</sup>H NMR (400 MHz, Chloroform-d):  $\delta$  3.77 (s, 6H), 4.74 (s, 2H), 6.78-6.84 (m, 4H), 7.12-7.14 (m, 2H), 7.21-7.28 (m, 2H), 8.32 (s, 1H).

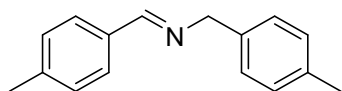

**(E)-N-(4-methylbenzyl)-1-(p-tolyl)methanimine (4H)**

The titled compound was made following the general procedure using p-tolylmethanamine (61 mg, 0.5 mmol) as starting material. The product was obtained as a colorless liquid (> 99% yield).

<sup>1</sup>H NMR (400 MHz, Chloroform-d): δ 2.32 (s, 3H), 2.36 (s, 3H), 4.75 (s, 2H), 7.12-7.14 (m, 2H), 7.19-7.22 (m, 4H), 7.65 (d, J = 8.0 Hz, 2H), 8.32 (s, 1H).

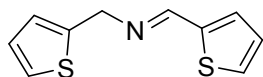

**(E)-1-(thiophen-2-yl)-N-(thiophen-2-ylmethyl)methanimine (4I)**

The titled compound was made following the general procedure using thiophen-2-ylmethanamine (61 mg, 0.5 mmol) as starting material. The product was obtained as a colorless liquid (> 99% yield).

<sup>1</sup>H NMR (400 MHz, Chloroform-d): δ 4.91 (s, 2H), 7.27-7.30 (m, 2H), 7.415 (dd, J1 = 2.0 Hz, J2 = 2.0 Hz, 1H), 7.57 (dd, J1 = 2.0 Hz, J2 = 2.0 Hz, 2H), 8.095 (dd, J1 = 4.0 Hz, J2 = 2.0 Hz, 1H), 8.80 (s, 1H).

## Section 12. Comparison of photocatalysts

**Table S2.** Physicochemical properties and photocatalytic activity of different photocatalysts for selective oxidation of sulfides.

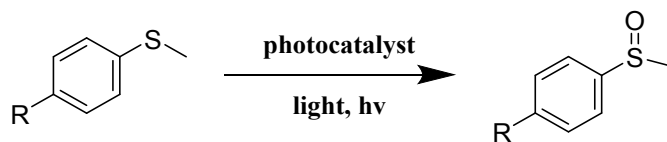

| entry           | catalysts                                               | -R              | Substrate<br>(mmol) | Inputs<br>(cat.)    | light                                 | gas            | time<br>(h) | conv.<br>(%) | sel. (%) | co-catalyst |
|-----------------|---------------------------------------------------------|-----------------|---------------------|---------------------|---------------------------------------|----------------|-------------|--------------|----------|-------------|
| 1 <sup>10</sup> | Ry-Td                                                   | H               | 1                   | 5mg                 | Xe lamp<br>( $\lambda > 420$ nm)      | O <sub>2</sub> |             | 100          | 96       | none        |
| 2 <sup>11</sup> | spherical-COF 1a                                        |                 |                     |                     |                                       |                | 48          | 100          |          |             |
|                 | laminar-COF 1b                                          | CH <sub>3</sub> | 0.3                 | 2.4mg               | blue light<br>( $\lambda = 450$ nm)   | O <sub>2</sub> | 48          | 80           |          | none        |
|                 | 3D-COF 1c                                               |                 |                     |                     |                                       |                | 48          | 77           |          |             |
| 3 <sup>12</sup> | 4 wt % C <sub>60</sub> /g-C <sub>3</sub> N <sub>4</sub> | H               | 0.2                 | 30mg                | Xe lamp<br>( $\lambda > 400$ nm)      | O <sub>2</sub> | 10          | 94.35        | 100      | none        |
| 4 <sup>13</sup> | B-(NPh <sub>2</sub> ) <sub>3</sub>                      |                 |                     |                     |                                       |                | 48          | 33           | 99       |             |
|                 | B-CB <sub>3</sub>                                       | H               | 2                   | 10mg                | LED lamp<br>( $\lambda = 460$ nm)     | air            | 48          | 93           | 99       | none        |
|                 | B-CB <sub>2</sub> -BT                                   |                 |                     |                     |                                       |                | 24          | 98           | 99       |             |
| 5 <sup>14</sup> | C-CMP                                                   | H               | 1                   | 20mg                | 300W Xe lamp<br>( $\lambda > 400$ nm) | O <sub>2</sub> | 8           | 99           | 93       | none        |
| 6 <sup>15</sup> | CPOP-28                                                 |                 |                     |                     |                                       |                | 10          | 79           | 98       |             |
|                 | CPOP-29                                                 | H               | 0.5                 | 1mol%               | 23 W white<br>LED lamp                | air            | 10          | 99           | 99       | none        |
| 7 <sup>16</sup> | CMP-BDD                                                 |                 |                     |                     |                                       |                | 24          | 99           | 99       | HCl         |
|                 | CMP-B                                                   | H               | 1                   | 20mg                | 14 W blue<br>LED lamp                 | O <sub>2</sub> |             | 21           | 99       | HCl         |
| 8               | This work                                               | H               | 0.5                 | 2.45mg<br>(0.5mol%) | LED lamp<br>( $\lambda = 460$ nm)     | air            | 48          | 99           | 99       | none        |

**Table S3.** Physicochemical properties and photocatalytic activity of different photocatalysts for selective oxidation of amines to imines.

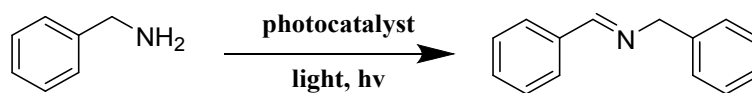

| entry           | catalysts                         | Substrate<br>(mmol) | Inputs<br>(cat.)    | light                         | gas             | time<br>(h) | conv.<br>(%) | sel. (%) | temperature<br>(°C) |
|-----------------|-----------------------------------|---------------------|---------------------|-------------------------------|-----------------|-------------|--------------|----------|---------------------|
| 11 <sup>7</sup> | mpg-C <sub>3</sub> N <sub>4</sub> | 1                   | 50mg                | Xe lamp<br>(λ > 420 nm)       | O <sub>2</sub>  | 3.5         | 99           | 99       | 80                  |
| 2 <sup>18</sup> | K-PHI                             | 0.05                | 5mg                 | blue LED<br>(λ = 461 nm)      | CO <sub>2</sub> | 24          | 100          | 90       | 35                  |
| 3 <sup>19</sup> | CNUIO-5                           | 0.05                | 5mg                 | Xe lamp<br>(λ > 420 nm)       | air             | 5           | 58.9         | 99       | RT                  |
| 4 <sup>20</sup> | 2-ZSCN                            | 0.5                 | 50mg                | visible light<br>(λ > 420 nm) | O <sub>2</sub>  | 5           | 92           | 97       | RT                  |
| 5 <sup>21</sup> | B-BO-1,3,5                        | 1                   | 6mg                 | blue LED<br>(λ = 460 nm)      | O <sub>2</sub>  | 24 (3<br>)  | 99 (48<br>)  |          | RT                  |
| 6 <sup>22</sup> | TFPT-<br>BMTH                     | 0.2                 | 5mmol%              | 30 W blue LED<br>(λ = 454 nm) | air             | 24          | 99           |          | RT                  |
| 7 <sup>23</sup> | Py-BSZ-COF                        | 0.2                 | 5mg                 | 15 W LED bulb<br>(λ = 520 nm) | air             | 12          | 99           |          | RT                  |
| 8               | This work                         | 0.5                 | 2.45mg<br>(0.5mol%) | LED lamp<br>(λ = 460 nm)      | air             | 24          | 99           | 99       | RT                  |

---

## Section 13. Reference

### References:

1. X. Zhu, S. An, Y. Liu, J. Hu, H. Liu, C. Tian, S. Dai, X. Yang, H. Wang, C. W. Abney and S. Dai, *AIChE J.*, 2017, **63**, 3470-3478.
2. J. A. Riddle, S. P. Lathrop, J. C. Bollinger and D. Lee, *J. Am. Chem. Soc.*, 2006, **128**, 10986-10987.
3. C. R. DeBlase, K. E. Silberstein, T. T. Truong, H. D. Abruna and W. R. Dichtel, *J. Am. Chem. Soc.*, 2013, **135**, 16821-16824.
4. P. Das, A. Kumar, A. Chowdhury and P. S. Mukherjee, *ACS Omega*, 2018, **3**, 13757-13771.
5. S. Bandyopadhyay, A. G. Anil, A. James and A. Patra, *ACS Appl. Mater. Interfaces*, 2016, **8**, 27669-27678.
6. M. Liras, M. Iglesias and F. Sánchez, *Macromolecules*, 2016, **49**, 1666-1673.
7. J. A. Johnson, X. Zhang, T. C. Reeson, Y.-S. Chen, and J. Zhang, *J. Am. Chem. Soc.*, 2014, **136**, 15881-15884.
8. J. Luo, J.-Z. Lu and J. Zhang, *J. Mater. Chem. A*, 2018, **6**, 15154-15161.
9. J. A. Johnson, J. Luo, X. Zhang, Y.-S. Chen, M. D. Morton, E. Echeverría, F. E. Torres, and J. Zhang, *ACS Catal.*, 2015, **5**, 5283-5291.
10. S. Wang, Q. Sun, W. Chen, Y. Tang, B. Aguila, Y. Pan, A. Zheng, Z. Yang, L. Wojtas, S. Ma and F.-S. Xiao, *Matter*, 2020, **2**, 416-427.
11. A. Jiménez-Almarza, A. López-Magano, L. Marzo, S. Cabrera, R. Mas-Ballesté and J. Alemán, *ChemCatChem*, 2019, **11**, 4916-4922.
12. X. Chen, K. Deng, P. Zhou and Z. Zhang, *ChemSusChem*, 2018, **11**, 2444-2452.
13. Z. J. Wang, S. Ghasimi, K. Landfester and K. A. Zhang, *Chem. Commun.*, 2014, **50**, 8177-8180.
14. C. Su, R. Tandiana, B. Tian, A. Sengupta, W. Tang, J. Su and K. P. Loh, *ACS Catal.*, 2016, **6**, 3594-3599.
15. H.-P. Liang, Q. Chen and B.-H. Han, *ACS Catal.*, 2018, **8**, 5313-5322.
16. H. Zhang, Q. Huang, W. Zhang, C. Pan, J. Wang, C. Ai, J. Tang and G. Yu, *ChemPhotoChem*, 2019, **3**, 645-651.
17. F. Su, S. C. Mathew, L. Mohlmann, M. Antonietti, X. Wang and S. Blechert, *Angew. Chem. Int. Ed.*, 2011, **50**, 657-660.
18. Y. Markushyna, P. Lamagni, J. Catalano, N. Lock, G. Zhang, M. Antonietti and A. Savateev, *ACS Catal.*, 2020, **10**, 7336-7342.
19. S. Zhang, K. Chen, W. Peng and J. Huang, *New J. Chem.*, 2020, **44**, 3052-3061.
20. P. Chen, L.-H. Meng, L. Chen, J.-K. Guo, S. Shen, C.-T. Au and S.-F. Yin, *ACS Sustainable Chem. Eng.*, 2019, **7**, 14203-14209.
21. Z. J. Wang, S. Ghasimi, K. Landfester and K. A. Zhang, *Adv. Mater.*, 2015, **27**, 6265-6270.
22. Z. Liu, Q. Su, P. Ju, X. Li, G. Li, Q. Wu and B. Yang, *Chem. Commun.*, 2020, **56**, 766-769.

- 
23. S. Li, L. Li, Y. Li, L. Dai, C. Liu, Y. Liu, J. Li, J. Lv, P. Li and B. Wang, *ACS Catal.*, 2020, **10**, 8717-8726.
